# Supplementary material for: Antibiotic Resistance, Biofilm Formation, and Presence of Genes Encoding Virulence Factors in Strains Isolated from the Pharmaceutical Production Environment
Source: PubMed Central journal article supplement (PMC7911615; doi:10.3390/pathogens10020130), 2021-01-27
Supplement: pathogens-10-00130-s001.pdf [file pathogens-10-00130-s001.pdf]

## Supplementary 1

**Table S1.** The qualitative identification of genes taking part in the *Quorum Sensing* (QS), genes encoding virulence factors, and biofilm formation rate in *Pseudomonas aeruginosa* strains isolated from the pharmaceutical environment. Results for the particular isolated strains.

| Strain | Presence (+)/Absence (-) of QS Genes |             |             |             | Presence (+)/Absence (-) of Virulence Factors Genes |             |              |             | Biofilm Formation§ |
|--------|--------------------------------------|-------------|-------------|-------------|-----------------------------------------------------|-------------|--------------|-------------|--------------------|
|        | <i>IasI</i>                          | <i>IasR</i> | <i>rhlI</i> | <i>rhlR</i> | <i>lasB</i>                                         | <i>aprE</i> | <i>lysyl</i> | <i>toxA</i> |                    |
| PAO 1  | +                                    | +           | +           | +           | +                                                   | +           | +            | +           | Strong             |
| PA-1   | +                                    | +           | +           | +           | +                                                   | +           | +            | +           | Strong             |
| PA-2   | +                                    | +           | +           | +           | +                                                   | -           | -            | +           | Strong             |
| PA-3   | +                                    | +           | +           | +           | +                                                   | +           | +            | +           | Strong             |
| PA-4   | +                                    | +           | +           | +           | -                                                   | -           | -            | +           | Strong             |
| PA-5   | +                                    | +           | +           | -           | +                                                   | -           | +            | +           | Strong             |
| PA-6   | +                                    | +           | +           | +           | +                                                   | -           | -            | +           | Strong             |
| PA-7   | +                                    | +           | +           | +           | +                                                   | +           | -            | +           | Poor               |
| PA-8   | -                                    | -           | +           | -           | +                                                   | -           | -            | +           | Poor               |
| PA-9   | +                                    | +           | +           | +           | +                                                   | +           | +            | +           | Strong             |
| PA-10  | +                                    | +           | +           | +           | +                                                   | +           | +            | +           | Strong             |
| PA-11  | +                                    | +           | +           | +           | +                                                   | +           | -            | +           | Strong             |
| PA-12  | +                                    | +           | +           | +           | +                                                   | -           | -            | +           | Strong             |
| PA-13  | +                                    | +           | +           | +           | +                                                   | -           | -            | +           | Strong             |
| PA-14  | +                                    | +           | +           | +           | +                                                   | -           | -            | +           | Strong             |
| PA-15  | +                                    | +           | +           | +           | +                                                   | -           | +            | +           | Strong             |
| PA-16  | -                                    | -           | -           | -           | -                                                   | -           | -            | -           | Moderate           |
| PA-17  | -                                    | -           | +           | +           | +                                                   | +           | -            | +           | Strong             |
| PA-18  | -                                    | +           | -           | +           | +                                                   | +           | -            | +           | Moderate           |
| PA-19  | -                                    | +           | +           | +           | +                                                   | +           | -            | +           | Strong             |
| PA-20  | +                                    | +           | +           | +           | +                                                   | -           | +            | +           | Strong             |
| PA-21  | +                                    | +           | +           | +           | +                                                   | -           | -            | +           | Strong             |
| PA-22  | +                                    | +           | +           | +           | +                                                   | +           | -            | +           | Strong             |
| PA-23  | +                                    | +           | +           | +           | +                                                   | -           | -            | +           | Strong             |
| PA-24  | +                                    | +           | -           | +           | +                                                   | +           | -            | +           | Strong             |
| PA-25  | +                                    | +           | +           | +           | +                                                   | +           | +            | +           | Strong             |
| PA-26  | +                                    | +           | -           | -           | +                                                   | -           | -            | +           | Strong             |
| PA-27  | +                                    | +           | +           | +           | +                                                   | +           | +            | +           | Strong             |
| PA-28  | +                                    | +           | +           | +           | +                                                   | -           | -            | +           | Strong             |
| PA-29  | +                                    | +           | +           | -           | +                                                   | +           | +            | +           | Strong             |
| PA-30  | +                                    | +           | +           | +           | +                                                   | +           | +            | +           | Strong             |
| PA-31  | -                                    | -           | -           | -           | -                                                   | -           | -            | +           | Poor               |
| PA-32  | +                                    | +           | -           | -           | +                                                   | -           | +            | +           | Moderate           |
| PA-33  | +                                    | +           | +           | +           | +                                                   | +           | -            | +           | Strong             |
| PA-34  | +                                    | +           | -           | -           | +                                                   | +           | +            | +           | Strong             |
| PA-35  | -                                    | -           | -           | -           | +                                                   | -           | -            | +           | Strong             |
| PA-36  | +                                    | +           | +           | +           | +                                                   | +           | -            | +           | Strong             |
| PA-37  | +                                    | +           | +           | +           | +                                                   | -           | +            | +           | Strong             |
| PA-38  | +                                    | +           | +           | +           | +                                                   | +           | +            | +           | Strong             |
| PA-39  | +                                    | +           | +           | +           | +                                                   | -           | -            | +           | Strong             |
| PA-40  | +                                    | +           | +           | +           | +                                                   | -           | +            | +           | Strong             |

|       |   |   |   |   |   |   |   |   |        |
|-------|---|---|---|---|---|---|---|---|--------|
| PA-41 | + | + | + | + | + | + | - | + | Poor   |
| PA-42 | + | + | - | + | + | + | - | + | Strong |
| PA-43 | + | + | + | + | + | + | + | + | Strong |
| PA-44 | + | + | + | + | + | - | + | + | Strong |
| PA-45 | + | + | + | + | + | - | - | + | Strong |
| PA-46 | + | + | + | + | + | + | - | + | Strong |

§ Non-biofilm producer:  $OD \leq OD_c$ ; Poor-biofilm producer:  $OD_c < OD \leq 2 \times OD_c$ ; Moderate-biofilm producer:  $2 \times OD_c < OD \leq 4 \times OD_c$ ; Strong-biofilm producer:  $OD > 4 \times OD_c$ .

**Table S2.** The qualitative identification of genes taking part in the *Quorum Sensing* (QS), genes encoding virulence factors, and biofilm formation rate in *Pseudomonas aeruginosa* strains isolated from the pharmaceutical environment. Summation of the experimental observations concerning the presence of QS and virulence factors genes

| Presence of Genes in <i>P. aeruginosa</i> Strains |      |
|---------------------------------------------------|------|
| %                                                 |      |
| <b>Quorum Sensing Genes</b>                       |      |
| <i>lasI</i>                                       | 84.8 |
| <i>lasR</i>                                       | 89.1 |
| <i>rhlI</i>                                       | 80.4 |
| <i>rhlR</i>                                       | 80.4 |
| <b>Virulence Factors Genes</b>                    |      |
| <i>lasB</i>                                       | 93.4 |
| <i>aprE</i>                                       | 52.3 |
| <i>lysyl</i>                                      | 39.1 |
| <i>toxA</i>                                       | 97.8 |

**Table S3.** The qualitative identification of genes taking part in the *Quorum Sensing* (QS), genes encoding virulence factors, and biofilm formation rate in *Pseudomonas aeruginosa* strains isolated from the pharmaceutical environment. Summation of the experimental observations concerning the ability to form biofilm by tested strains.

| Biofilm Producers | Strains % |
|-------------------|-----------|
| Strong            | 84.8      |
| Moderate          | 6.5       |
| Poor              | 8.7       |

**Table S4.** PCR detection of tested genes. Oligonucleotide sequences for identification of genes taking part in *Quorum Sensing* and genes encoding virulence factors in *P. aeruginosa* strains.

|                                    | Sequence (5'-3')                                         | Amplicon Size (bp) | Annealing Temp. (°C) |
|------------------------------------|----------------------------------------------------------|--------------------|----------------------|
| <b><i>Quorum Sensing</i> genes</b> |                                                          |                    |                      |
| <i>lasI</i>                        | F: GGCTGGGACGTTAGTGTCAT<br>R: CCAGCGTACAGTCGGAAAA        | 274                | 59.8                 |
| <i>lasR</i>                        | F: AAGGACAGCCAGGACTACGA<br>R: CCGAGCAGTTGCAGATAACC       | 490                | 54.6                 |
| <i>rhlI</i>                        | F: GTTCGACCATCCGCAAAC<br>R: GTCTCGCCCTTGACCTTCT          | 354                | 60.9                 |
| <i>rhlR</i>                        | F: CATGGCACCTATCCCAAGG<br>R: GGTCCATTGCAGGATCTCG         | 396                | 60.9                 |
| <b>Virulence factors genes</b>     |                                                          |                    |                      |
| Alkaline protease ( <i>aprE</i> )  | F: GCAGAACAAGCACCCCTACTAC<br>R: AACAGGGGCTTGAACAGGTA     | 156                | 60.40                |
| Elastase ( <i>lasB</i> )           | F: CGAGAATGACAAAGTGGAAGTGG<br>R: CGTAGGTGTAAGTGGCCGATCTT | 218                | 60.0                 |
| Endopeptidase IV ( <i>lysyl</i> )  | F: GTCACCTACGACGGGCATAC<br>R: CGCTGAAATCGGAGAAGTAGTC     | 196                | 62.2                 |
| Exotoxin A ( <i>toxA</i> )         | F: GGAGCGCAACTATCCCACT<br>R: TGGTAGCCGACGAACACATA        | 150                | 56.3                 |

**Supplementary 2.** PCR reaction conditions.

Specificity of the starters was checked in BLAST Assembled Ref Genomes <https://blast.ncbi.nlm.nih.gov/Blast.cgi> programme. The following PCR reaction mixture was used: buffer with MgCl<sub>2</sub> (1x), dNTP Mix (0.2 mM each), primer pair (10 μM), thermostable Taq polymerase (1U), DNA (100–200 ng) isolated from the tested *P. aeruginosa* strains. As a negative control, the reaction mixture with water instead of bacterial DNA was used. The positive control was a DNA sample isolated from the strain of *P. aeruginosa* PAO1.

Parameters of amplification cycles: denaturation in 94 °C for 3 min, hybridisation of starters (Table S1A), for 1 min and extending starters in 72 °C for 1 min, for 30 cycles.

Presence of the amplified products of PCR reaction was evaluated using electrophoretic separation in 1.5% agarose gel against the weight molecular marker. The electrophoresis was carried out within 40 min under constant voltage of 130 V. Visualization of the product was carried out in UV light in transilluminator (Syngen).
